# Supplementary material for: Metal–ligand bond in group-11 complexes and nanoclusters
Source: Royal Society of Chemistry journal article supplement (doi:10.1039/d4cp00848k), 2024-01-01
Supplement: d4cp00848k1.pdf [file d4cp00848k1.pdf]

**Supplementary information for :**

**Metal-ligand bond in group-11 complexes and nanoclusters**

Maryam Sabooni Asre Hazer,<sup>a</sup> Sami Malola,<sup>b</sup> and Hannu Häkkinen<sup>\*a,b,c</sup>

<sup>a</sup> Department of Chemistry, Nanoscience Center, University of Jyväskylä, FI-40014 Jyväskylä, Finland

<sup>b</sup> Department of Physics, Nanoscience Center, University of Jyväskylä, FI-40014 Jyväskylä, Finland

<sup>c</sup> Carbon to Metal Coating Institute, Queen's University, Kingston, Ontario, K7L 3N6, Canada

\* hannu.j.hakkinen@jyu.fi

Electronic Supporting Information:

Table S1. Calculated bond angles for M-S-C in M-SR (R= SCH<sub>3</sub> and SC<sub>8</sub>H<sub>9</sub>) using PBE and BEEF-vdW.

| M-SR                              | PBE    | BEEF-vdW |
|-----------------------------------|--------|----------|
| Cu-SCH <sub>3</sub>               | 105.5  | 105.3    |
| Ag-SCH <sub>3</sub>               | 105.5  | 105.2    |
| Au-SCH <sub>3</sub>               | 104.0  | 104.8    |
| Cu-SC <sub>8</sub> H <sub>9</sub> | 105.5  | 104.4    |
| Ag-SC <sub>8</sub> H <sub>9</sub> | 104.51 | 104.6    |
| Au-SC <sub>8</sub> H <sub>9</sub> | 102.48 | 102.2    |

Table S2. Calculated bond lengths (Å) of M-L complexes and binding energy (eV) using PBE and BEEF-vdW.

| M-L                               | PBE             |                | BEEF-vdW        |                 |
|-----------------------------------|-----------------|----------------|-----------------|-----------------|
|                                   | $\Delta E$ (eV) | Bond length(Å) | $\Delta E$ (eV) | Bond length (Å) |
| Cu-SCH <sub>3</sub>               | -1.22           | 2.09           | -1.08           | 2.12            |
| Ag-SCH <sub>3</sub>               | -0.62           | 2.31           | -0.55           | 2.36            |
| Au-SCH <sub>3</sub>               | -0.97           | 2.25           | -0.776          | 2.29            |
| Cu-SC <sub>8</sub> H <sub>9</sub> | -1.28           | 2.09           | -1.09           | 2.12            |
| Ag-SC <sub>8</sub> H <sub>9</sub> | -0.69           | 2.31           | -0.55           | 2.37            |
| Au-SC <sub>8</sub> H <sub>9</sub> | -1.02           | 2.25           | -0.786          | 2.29            |
| Cu-PPh <sub>3</sub>               | -1.07           | 2.22           | -0.75           | 2.29            |
| Ag-PPh <sub>3</sub>               | -0.59           | 2.51           | -0.40           | 2.65            |
| Au-PPh <sub>3</sub>               | -1.35           | 2.35           | -0.97           | 2.41            |
| Cu-NHC <sup>Me</sup>              | -1.54           | 1.92           | -1.14           | 1.96            |
| Ag-NHC <sup>Me</sup>              | -0.90           | 2.18           | -0.58           | 2.26            |
| Au-NHC <sup>Me</sup>              | -1.63           | 2.08           | -1.18           | 2.13            |
| Cu-NHC <sup>Et</sup>              | -1.54           | 1.91           | -1.16           | 1.96            |
| Ag-NHC <sup>Et</sup>              | -0.90           | 2.17           | -0.59           | 2.27            |
| Au-NHC <sup>Et</sup>              | -1.65           | 2.08           | -1.201          | 2.15            |
| Cu-NHC <sup>iPr</sup>             | -1.55           | 1.92           | -1.18           | 1.98            |
| Ag-NHC <sup>iPr</sup>             | -0.90           | 2.18           | -0.63           | 2.28            |
| Au-NHC <sup>iPr</sup>             | -1.64           | 2.08           | -1.216          | 2.16            |
| Cu-NHC <sup>Bn</sup>              | -1.60           | 1.92           | -1.2            | 1.96            |
| Ag-NHC <sup>Bn</sup>              | -0.96           | 2.17           | -0.61           | 2.27            |
| Au-NHC <sup>Bn</sup>              | -1.69           | 2.09           | -1.23           | 2.39            |
| Cu-CCMe                           | -0.67           | 1.79           | -0.48           | 1.81            |
| Ag-CCMe                           | 0.06            | 1.98           | 0.20            | 2.03            |
| Au-CCMe                           | -0.37           | 1.91           | -0.11           | 1.94            |
| Cu-CCPh                           | -0.71           | 1.79           | -0.52           | 1.82            |
| Ag-CCPh                           | 0.02            | 1.99           | 0.16            | 2.03            |
| Au-CCPh                           | -0.40           | 1.91           | -0.12           | 1.94            |

Figure S1. Projected density of states for (a) Cu-PPh<sub>3</sub> (b) Ag-PPh<sub>3</sub> and (c) Au-PPh<sub>3</sub>.

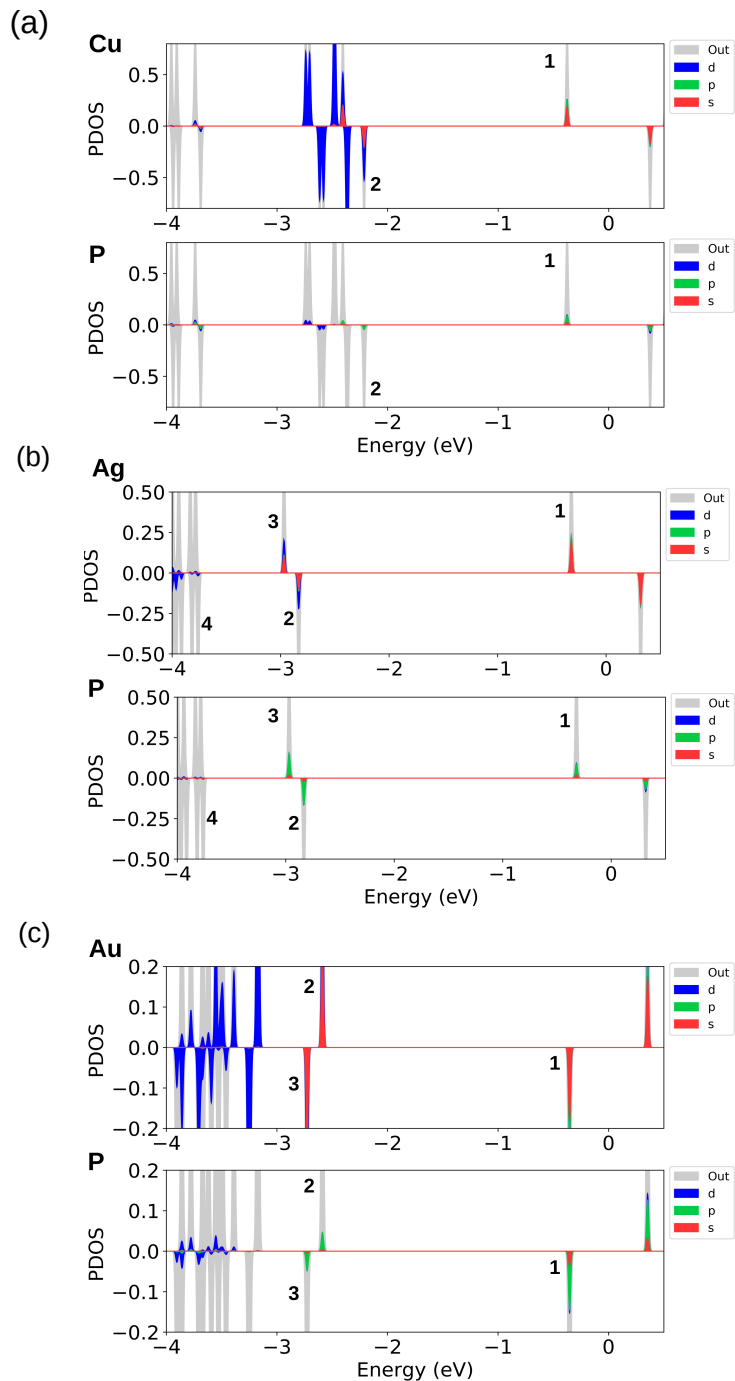

Figure S2. Projected density of states for (a) Cu-NHC<sup>Me</sup> (b) Ag-NHC<sup>Me</sup> and (c) Au-NHC<sup>Me</sup>.

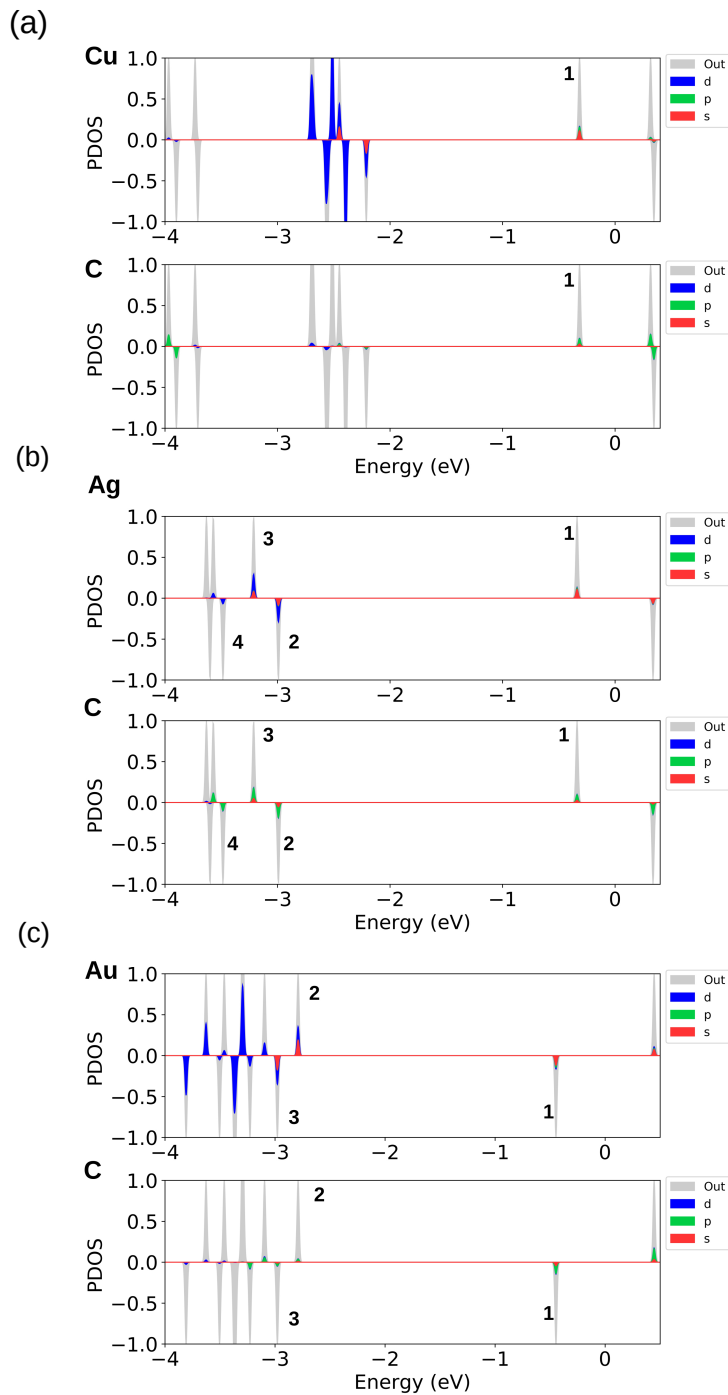

Figure S3.  
 (a) Cu-CCMe (b) Ag-CCMe, and (c) Au-CCMe

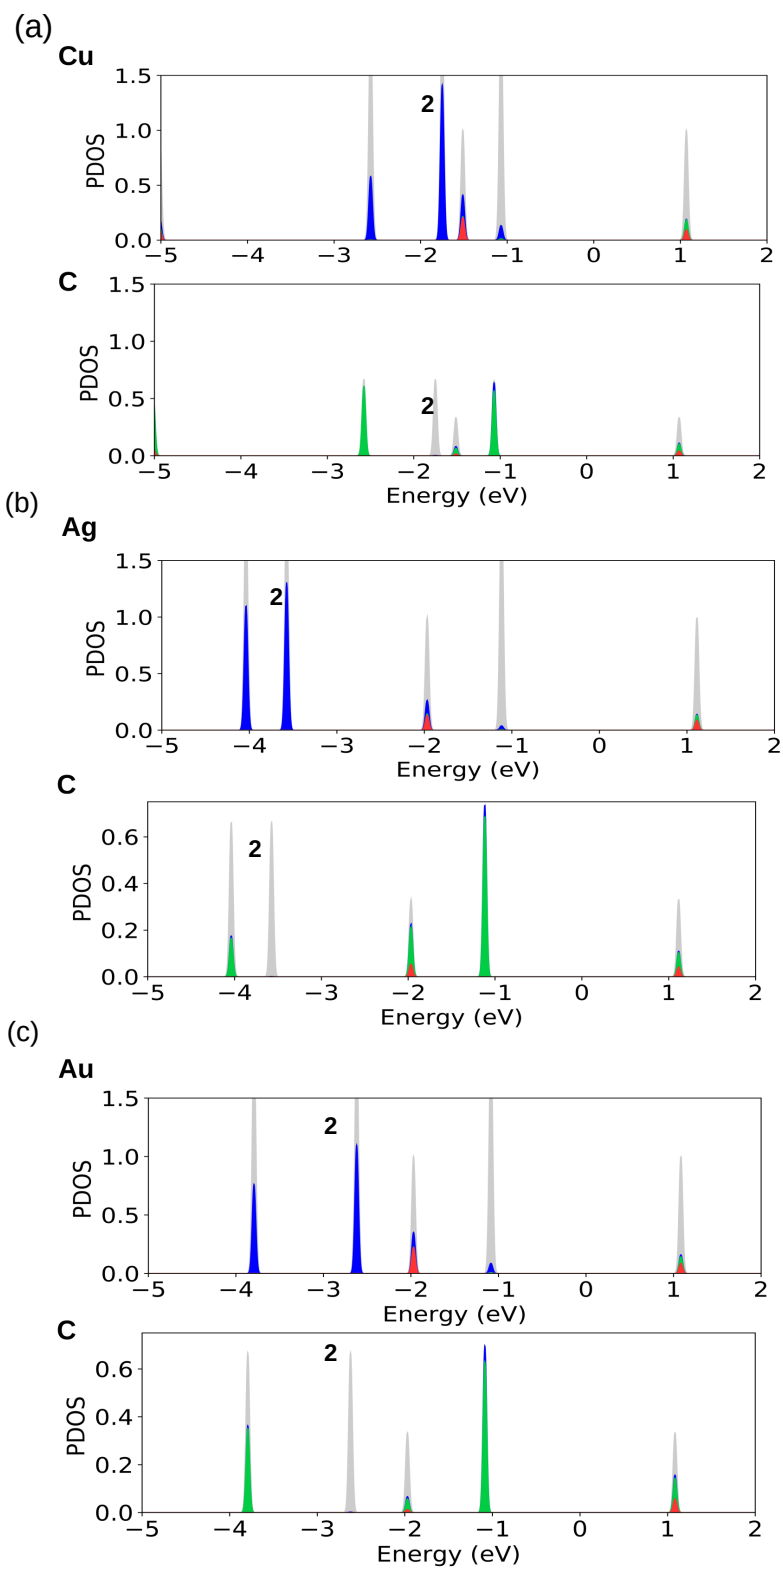

Figure S4.  
 (a) Cu-CCPh (b) Ag-CCPh, (c) Au-CCPh

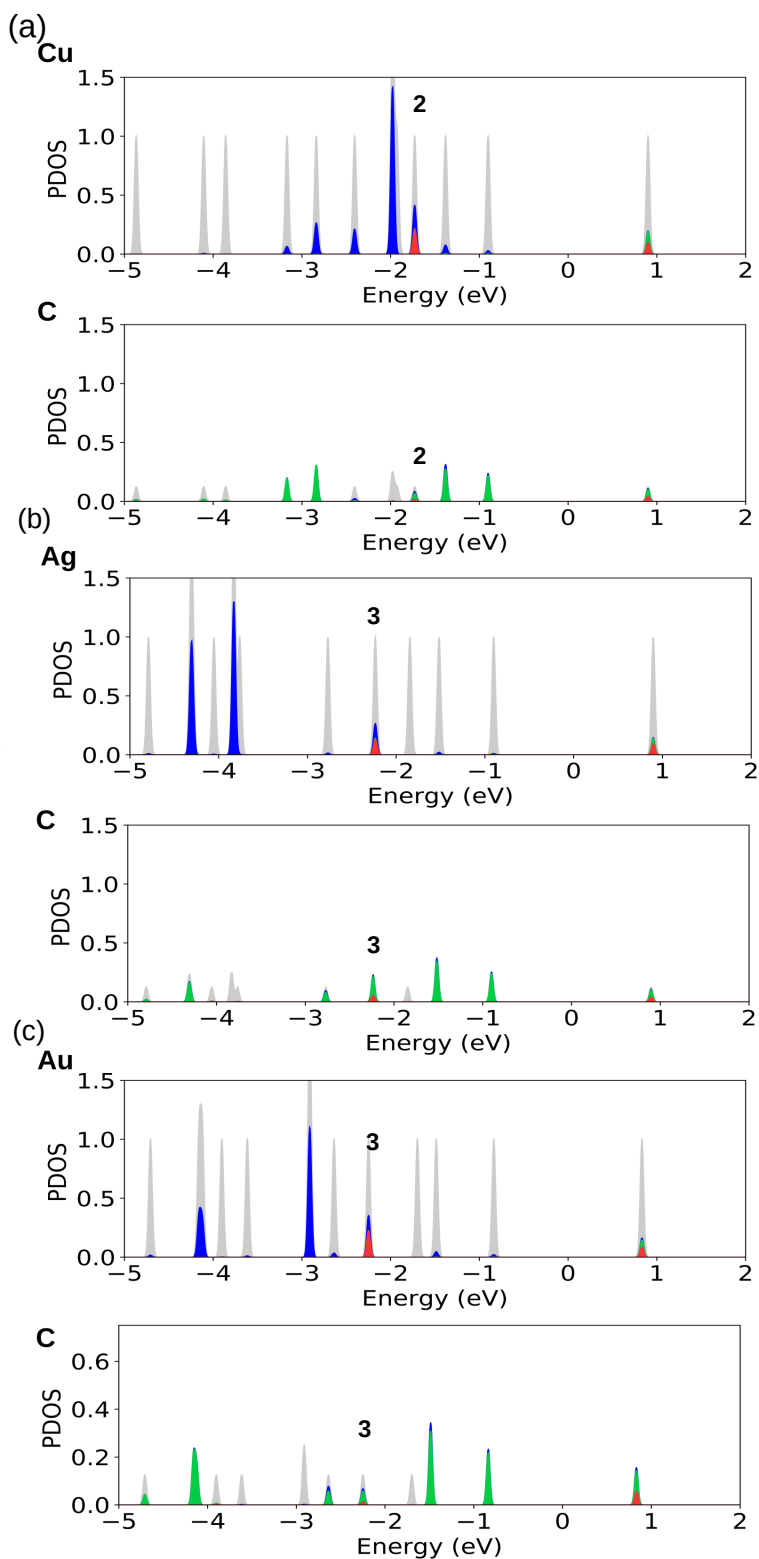

The numbers 2 and 3 in the Figures S3 and 4 refer to HOMO-2 and HOMO-3.

Table S3. Bader charges for M-L complexes optimized with PBE.

| M-L                               | M<br>Total Q (e)<br>N=1 | S<br>Total Q (e)<br>N=1 | C,H<br>Total Q (e)<br>N= 4     |
|-----------------------------------|-------------------------|-------------------------|--------------------------------|
| Cu-SCH <sub>3</sub>               | 0.27                    | -0.27                   | -0.001                         |
| Ag-SCH <sub>3</sub>               | 0.26                    | -0.22                   | -0.04                          |
| Au-SCH <sub>3</sub>               | 0.03                    | -0.0006                 | -0.034                         |
| M-L                               | M<br>Total Q (e)<br>N=1 | S<br>Total Q (e)<br>N=1 | C,H<br>Total Q (e)<br>N= 17    |
| Cu-SC <sub>8</sub> H <sub>9</sub> | 0.27                    | -0.30                   | 0.03                           |
| Ag-SC <sub>8</sub> H <sub>9</sub> | 0.26                    | -0.27                   | 0.01                           |
| Au-SC <sub>8</sub> H <sub>9</sub> | 0.03                    | -0.08                   | 0.05                           |
| M-L                               | M<br>Total Q (e)<br>N=1 | P<br>Total Q (e)<br>N=1 | C,H<br>Total Q (e)<br>N= 33    |
| Cu-PPh <sub>3</sub>               | -0.16                   | 1.55                    | -1.39                          |
| Ag-PPh <sub>3</sub>               | -0.19                   | 1.54                    | -1.35                          |
| Au-PPh <sub>3</sub>               | -0.37                   | 1.67                    | -1.31                          |
| M-L                               | M<br>Total Q (e)<br>N=1 | C<br>Total Q (e)<br>N=1 | C,H, N<br>Total Q (e)<br>N= 20 |
| Cu-NHC <sup>Me</sup>              | -0.11                   | 0.67                    | -0.57                          |
| Ag-NHC <sup>Me</sup>              | -0.14                   | 0.73                    | -0.59                          |
| Au-NHC <sup>Me</sup>              | -0.27                   | 0.82                    | -0.54                          |
| M-L                               | M<br>Total Q (e)<br>N=1 | C<br>Total Q (e)<br>N=1 | C,H, N<br>Total Q (e)<br>N= 26 |
| Cu-NHC <sup>Et</sup>              | -0.12                   | 0.71                    | -0.59                          |
| Ag-NHC <sup>Et</sup>              | -0.16                   | 0.69                    | -0.53                          |
| Au-NHC <sup>Et</sup>              | -0.27                   | 0.77                    | -0.50                          |
| M-L                               | M<br>Total Q (e)<br>N=1 | C<br>Total Q (e)<br>N=1 | C,H, N<br>Total Q (e)<br>N= 32 |
| Cu-NHC <sup>iPr</sup>             | -0.12                   | 0.69                    | -0.57                          |

|                       |                         |                         |                                |
|-----------------------|-------------------------|-------------------------|--------------------------------|
| Ag-NHC <sup>iPr</sup> | -0.16                   | 0.75                    | -0.59                          |
| Au-NHC <sup>iPr</sup> | -0.29                   | 0.84                    | -0.55                          |
|                       | M<br>Total Q (e)<br>N=1 | C<br>Total Q (e)<br>N=1 | C,H, N<br>Total Q (e)<br>N= 40 |
| Cu-NHC <sup>Bn</sup>  | -0.08                   | 0.70                    | -0.62                          |
| Ag-NHC <sup>Bn</sup>  | -0.14                   | 0.74                    | -0.60                          |
| Au-NHC <sup>Bn</sup>  | -0.27                   | 0.84                    | -0.57                          |
|                       | M<br>Total Q (e)<br>N=1 | C<br>Total Q (e)<br>N=1 | C,H<br>Total Q (e)<br>N= 5     |
| Cu-CCMe               | 0.38                    | -0.11                   | -0.27                          |
| Ag-CCMe               | 0.37                    | -0.35                   | -0.016                         |
| Au-CCMe               | 0.16                    | 0.09                    | -0.25                          |
|                       | M<br>Total Q (e)<br>N=1 | C<br>Total Q (e)<br>N=1 | C,H<br>Total Q (e)<br>N= 12    |
| Cu-CCPh               | 0.40                    | 0.09                    | -0.49                          |
| Ag-CCPh               | 0.39                    | -0.42                   | 0.03                           |
| Au-CCPh               | 0.18                    | 0.09                    | -0.27                          |

Table S4. Calculated bond lengths (Å) of M-L<sub>1</sub> and M-L<sub>2</sub> in the L<sub>1</sub>-M-L<sub>2</sub> complexes and using PBE.

| L <sub>1</sub> -M-L <sub>2</sub> | Bond length (Å)  |                  |
|----------------------------------|------------------|------------------|
|                                  | M-L <sub>1</sub> | M-L <sub>2</sub> |
| NHC <sup>Bn</sup> -Cu-CCPh       | 1.89             | 1.84             |
| NHC <sup>Bn</sup> -Ag-CCPh       | 2.07             | 2.00             |
| NHC <sup>Bn</sup> -Au-CCPh       | 2.04             | 1.98             |
| PPh <sub>3</sub> -Cu-CCPh        | 2.18             | 1.84             |
| PPh <sub>3</sub> -Ag-CCPh        | 2.36             | 2.02             |
| PPh <sub>3</sub> -Au-CCPh        | 2.31             | 1.99             |

Table S5. Bader charges of  $L_1$ -M- $L_2$  complexes. Labelling:  $L_x$ : NHC/ $PPh_3$  groups without the terminal atom  $A_1$  (C or P) binding the metal atom M,  $A_1$ : terminal atom of NHC/ $PPh_3$  binding the metal atom, M: metal atom (Cu,Ag,Au) in the center,  $A_2$ : terminal atom C of the alkynyl group binding the metal atom M,  $L_y$ : alkynyl group without the terminal atom  $A_2$ . Charges are given in |e| units.

| $L_1$ -M- $L_2$ Structure  | $L_x$ | $L_x - A_1 - M$ | M     | $M - A_2 - L_y$ | $L_y$ |
|----------------------------|-------|-----------------|-------|-----------------|-------|
| NHC <sup>Bn</sup> -Cu-CCPh | -0.51 | +0.71           | +0.37 | -0.13           | -0.43 |
| NHC <sup>Bn</sup> -Ag-CCPh | -0.46 | +0.72           | +0.27 | -0.45           | -0.08 |
| NHC <sup>Bn</sup> -Au-CCPh | -0.47 | +0.78           | +0.13 | +0.05           | -0.48 |
| $PPh_3$ -Cu-CCPh           | -1.15 | +1.42           | +0.26 | -0.27           | -0.26 |
| $PPh_3$ -Ag-CCPh           | -0.93 | +1.18           | +0.30 | -0.46           | -0.09 |
| $PPh_3$ -Au-CCPh           | -1.13 | +1.58           | +0.01 | -0.60           | +0.14 |



Table S6. Calculated average bond lengths (Å) for M(center)-M(peripheral) and M-Br in  $[\text{TM}_{13}\text{L}_6\text{Br}_6]^-$  clusters using PBE and BEEF-vdW.

| $[\text{M}_{13}\text{L}_6\text{Br}_6]^-$                   | PBE       |      | BEEF-vdW  |      |
|------------------------------------------------------------|-----------|------|-----------|------|
|                                                            | M(c)-M(p) | M-Br | M(c)-M(p) | M-Br |
| $[\text{Cu}_{13}(\text{PPh}_3)_6\text{Br}_6]^-$            | 1.88      | 2.31 | 2.54      | 2.35 |
| $[\text{Ag}_{13}(\text{PPh}_3)_6\text{Br}_6]^-$            | 2.81      | 2.53 | 2.88      | 2.58 |
| $[\text{Au}_{13}(\text{PPh}_3)_6\text{Br}_6]^-$            | 2.86      | 2.51 | 2.90      | 2.55 |
| $[\text{Cu}_{13}(\text{NHC}^{\text{Me}})_6\text{Br}_6]^-$  | 1.87      | 2.33 | 2.53      | 2.36 |
| $[\text{Ag}_{13}(\text{NHC}^{\text{Me}})_6\text{Br}_6]^-$  | 2.80      | 2.56 | 2.86      | 2.60 |
| $[\text{Au}_{13}(\text{NHC}^{\text{Me}})_6\text{Br}_6]^-$  | 2.82      | 2.51 | 2.87      | 2.56 |
| $[\text{Cu}_{13}(\text{NHC}^{\text{Et}})_6\text{Br}_6]^-$  | 2.49      | 2.33 | -         | -    |
| $[\text{Ag}_{13}(\text{NHC}^{\text{Et}})_6\text{Br}_6]^-$  | 2.80      | 2.54 | -         | -    |
| $[\text{Au}_{13}(\text{NHC}^{\text{Et}})_6\text{Br}_6]^-$  | 2.83      | 2.51 | -         | -    |
| $[\text{Cu}_{13}(\text{NHC}^{\text{iPr}})_6\text{Br}_6]^-$ | 2.51      | 2.33 | -         | -    |
| $[\text{Ag}_{13}(\text{NHC}^{\text{iPr}})_6\text{Br}_6]^-$ | 2.81      | 2.55 | -         | -    |
| $[\text{Au}_{13}(\text{NHC}^{\text{iPr}})_6\text{Br}_6]^-$ | 2.82      | 2.52 | -         | -    |
| $[\text{Cu}_{13}(\text{NHC}^{\text{Bn}})_6\text{Br}_6]^-$  | 2.50      | 2.32 | -         | -    |
| $[\text{Ag}_{13}(\text{NHC}^{\text{Bn}})_6\text{Br}_6]^-$  | 2.80      | 2.54 | -         | -    |
| $[\text{Au}_{13}(\text{NHC}^{\text{Bn}})_6\text{Br}_6]^-$  | 2.84      | 2.51 | -         | -    |

Figure S5. Projected density of states for (a)  $[M_{13}(PPh_3)_6Br_6]^-$  and (b)  $[M_{13}(NHC^{Me})_6Br_6]^-$  ( $M = Cu, Ag, Au$ ).

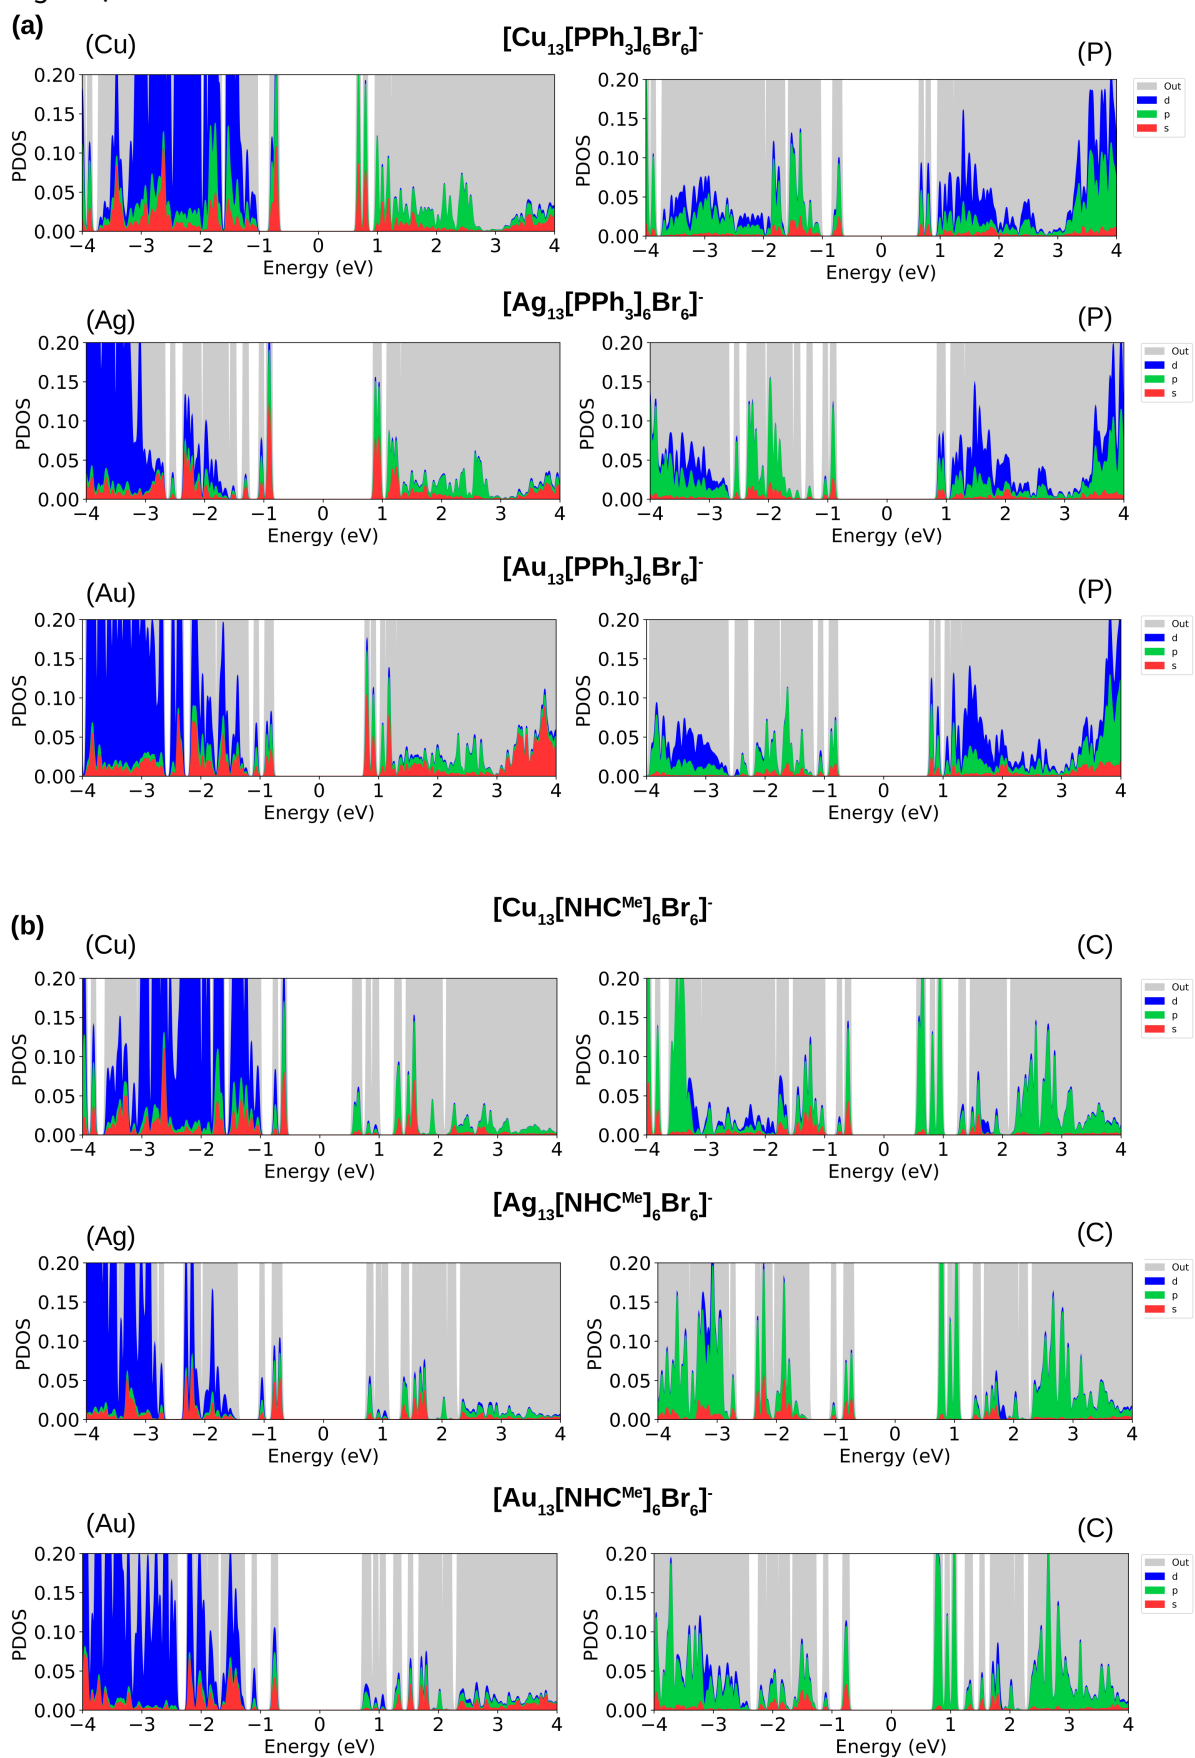

Table S7. Bader charges for  $[M_{13}L_6Br_6]^-$  clusters optimized with PBE ( $M_L$  is referring to the coinage metals bonded to ligand groups and  $M_{Br}$  is the coinage metals bonded to Br atoms).

|                                | $M_L$<br>Total Q (e)<br>N=6 | $M_{center}$<br>Total Q (e)<br>N=1 | $M_{Br}$<br>Total Q (e)<br>N=6 | P<br>Total Q (e)<br>N=6 | C,H<br>Total Q (e)<br>N= 198    | Br<br>Total Q (e)<br>N=6 |
|--------------------------------|-----------------------------|------------------------------------|--------------------------------|-------------------------|---------------------------------|--------------------------|
| $[Cu_{13}(PPh_3)_6Br_6]^-$     | 0.77                        | -0.13                              | 0.96                           | 8.39                    | -7.61                           | -3.38                    |
| $[Ag_{13}(PPh_3)_6Br_6]^-$     | 0.53                        | -0.10                              | 0.84                           | 8.82                    | -7.64                           | -3.46                    |
| $[Au_{13}(PPh_3)_6Br_6]^-$     | -0.28                       | -0.15                              | 0.23                           | 9.52                    | -7.46                           | -2.87                    |
|                                | $M_L$<br>Total Q (e)<br>N=6 | $M_{center}$<br>Total Q (e)<br>N=1 | $M_{Br}$<br>Total Q (e)<br>N=6 | C<br>Total Q (e)<br>N=6 | C,H, N<br>Total Q (e)<br>N= 120 | Br<br>Total Q (e)<br>N=6 |
| $[Cu_{13}(NHC^{Me})_6Br_6]^-$  | 1.18                        | -0.18                              | 0.94                           | 4.24                    | -3.55                           | -3.62                    |
| $[Ag_{13}(NHC^{Me})_6Br_6]^-$  | 0.82                        | -0.12                              | 0.82                           | 4.64                    | -3.46                           | -3.71                    |
| $[Au_{13}(NHC^{Me})_6Br_6]^-$  | 0.37                        | -0.20                              | 0.24                           | 4.84                    | -3.18                           | -3.06                    |
|                                | $M_L$<br>Total Q (e)<br>N=6 | $M_{center}$<br>Total Q (e)<br>N=1 | $M_{Br}$<br>Total Q (e)<br>N=6 | C<br>Total Q (e)<br>N=6 | C,H, N<br>Total Q (e)<br>N= 156 | Br<br>Total Q (e)<br>N=6 |
| $[Cu_{13}(NHC^{Et})_6Br_6]^-$  | 1.18                        | -0.18                              | 0.92                           | 4.35                    | -3.75                           | -3.53                    |
| $[Ag_{13}(NHC^{Et})_6Br_6]^-$  | 0.83                        | -0.13                              | 0.81                           | 4.62                    | -3.54                           | -3.60                    |
| $[Au_{13}(NHC^{Et})_6Br_6]^-$  | 0.34                        | -0.21                              | 0.23                           | 4.87                    | -3.26                           | -2.98                    |
|                                | $M_L$<br>Total Q (e)<br>N=6 | $M_{center}$<br>Total Q (e)<br>N=1 | $M_{Br}$<br>Total Q (e)<br>N=6 | C<br>Total Q (e)<br>N=6 | C,H, N<br>Total Q (e)<br>N= 192 | Br<br>Total Q (e)<br>N=6 |
| $[Cu_{13}(NHC^{iPr})_6Br_6]^-$ | 1.22                        | -0.16                              | 0.86                           | 4.04                    | -3.47                           | -3.49                    |
| $[Ag_{13}(NHC^{iPr})_6Br_6]^-$ | 0.83                        | -0.12                              | 0.82                           | 4.64                    | -3.58                           | -3.58                    |
| $[Au_{13}(NHC^{iPr})_6Br_6]^-$ | 0.34                        | -0.19                              | 0.23                           | 4.96                    | -3.36                           | -2.97                    |
|                                |                             |                                    |                                |                         |                                 |                          |
|                                | $M_L$<br>Total Q (e)<br>N=6 | $M_{center}$<br>Total Q (e)<br>N=1 | $M_{Br}$<br>Total Q (e)<br>N=6 | C<br>Total Q (e)<br>N=6 | C,H, N<br>Total Q (e)<br>N= 240 | Br<br>Total Q (e)<br>N=6 |
| $[Cu_{13}(NHC^{Bn})_6Br_6]^-$  | 1.18                        | -0.18                              | 0.92                           | 4.14                    | -3.58                           | -3.49                    |
| $[Ag_{13}(NHC^{Bn})_6Br_6]^-$  | 0.83                        | -0.12                              | 0.80                           | 4.60                    | -3.56                           | -3.55                    |
| $[Au_{13}(NHC^{Bn})_6Br_6]^-$  | 0.34                        | -0.20                              | 0.23                           | 4.84                    | -3.27                           | -2.94                    |
